# Supplementary material
Source: Springer Nature journal article supplement (https://www.springermedizin.de/resource/supplementary/12885_2012_4027_MOESM23_ESM.pdf/9465002)

# Carmine Alum Whole Mount

## A

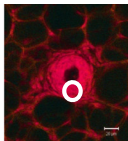

EX 750 nm

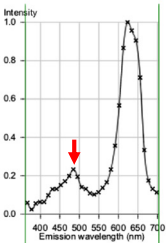

860 nm

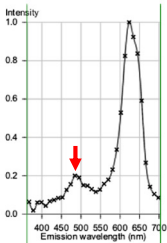

890 nm

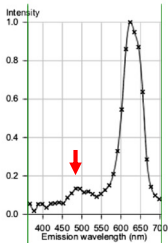

950 nm

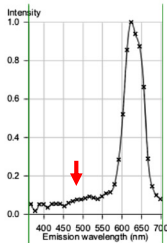

## B

Ex 750 nm

860 nm

950 nm

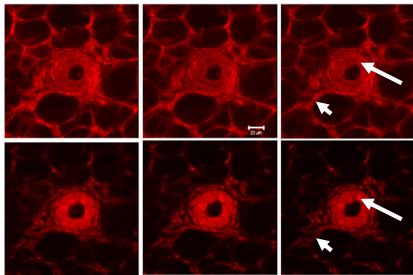

Em  
565-615  
nm

Em  
650-710  
nm

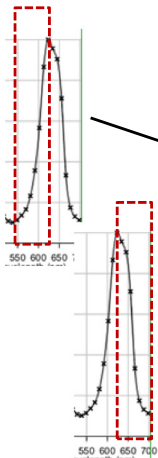

Supplement: MOESM23 [file 9465002]
